# Supplementary material for: Serum amyloid A1 and plasminogen as predictory proteins to monitor the progression of preleukemic diseases towards acute lymphoblastic leukaemia
Source: Royal Society of Chemistry journal article supplement (doi:10.1039/c7ra03445h), 2017-01-01
Supplement: c7ra03445h1.pdf [file c7ra03445h1.pdf]

### **Title**

Serum amyloid A1 and plasminogen as predictive proteins to monitor the progression of preleukemic diseases towards acute lymphoblastic leukaemia.

### **Authors**

Syed Kashif Raza <sup>1</sup>, Tahir Shamsi <sup>3</sup>, Syed Ghulam Musharraf<sup>\*1, 2</sup>,

### **Affiliation**

<sup>1</sup> Dr. Panjwani Center for Molecular Medicine and Drug Research, International Center for Chemical and Biological Science, University of Karachi, Karachi – 75270, Pakistan.

<sup>2</sup> H.E.J. Research Institute of Chemistry, International Center for Chemical and Biological Science, University of Karachi, Karachi – 75270, Pakistan.

<sup>3</sup> National institute of Blood Diseases, Karachi, Pakistan.

### **Keywords**

Acute lymphoblastic leukaemia, MALDI-TOF mass spectrometry, myelodysplastic syndrome, aplastic anaemia, ZOOM IEF

### **Corresponding Authors**

\* Dr. Panjwani Center for Molecular Medicine and Drug Research, International Center for Chemical and Biological Science, University of Karachi, Karachi – 75270, Pakistan

Tel.: 00-92-21-99261701-2

00-92-21-111222292 (ext. 134)

Fax: 00-92-213-34819018

00-92-99261713-4

E. mail: [musharraf1977@yahoo.com](mailto:musharraf1977@yahoo.com)

[musharraf@iccs.edu](mailto:musharraf@iccs.edu)

**Table S 1:** KEGG pathways involved by differentially regulated proteins in acute lymphoblastic leukaemia and preleukemic diseases.

| <b>Pathway</b>                                   | <b>False discovery rate</b> |
|--------------------------------------------------|-----------------------------|
| Complement and coagulation cascades              | 1.6e-59                     |
| Staphylococcus aureus infection                  | 2.47e-09                    |
| Platelet activation                              | 2.59e-06                    |
| Pertussis                                        | 0.000422                    |
| ECM-receptor interaction                         | 0.00899                     |
| PI3K-Akt signaling pathway                       | 0.00899                     |
| Transcriptional misregulation in cancer          | 0.00185                     |
| Proteoglycans in cancer                          | 0.00665                     |
| African trypanosomiasis                          | 0.000422                    |
| p53 signaling pathway                            | 0.0368                      |
| Rap1 signaling pathway                           | 0.0225                      |
| Inflammatory mediator regulation of TRP channels | 0.011                       |
| Systemic lupus erythematosus                     | 0.011                       |
| Neuroactive ligand-receptor interaction          | 0.00307                     |
| Malaria                                          | 0.0159                      |
| Cell cycle                                       | 0.0227                      |

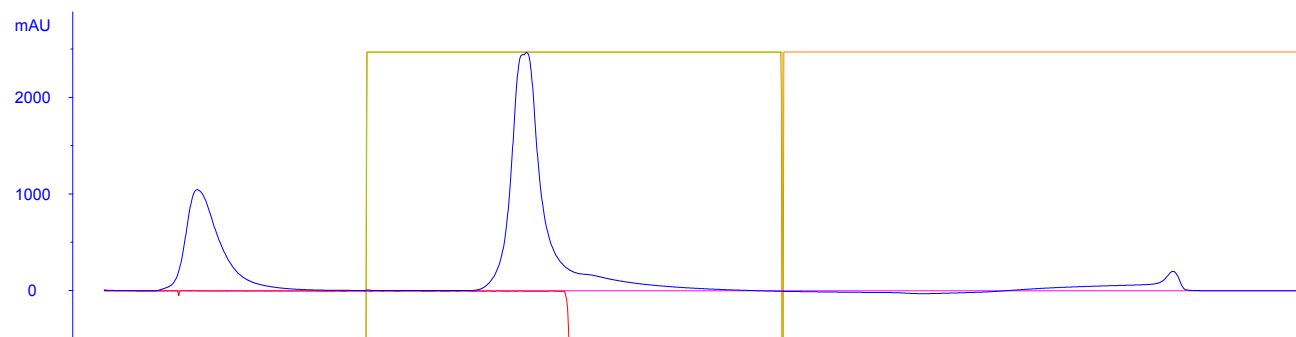

**Figure S 1:** Chromatogram of fast protein liquid chromatography (FPLC) during depletion of top seven abundant proteins using MARS hu-7 column.

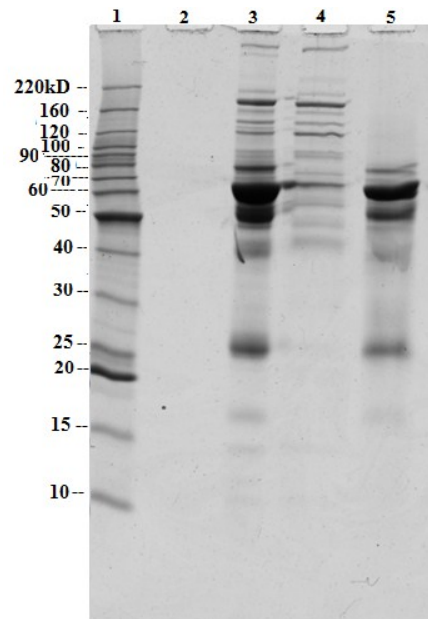

**Figure S 2:** Checking depletion efficiency of MARS column. Fractions loaded were equivalent to 0.1  $\mu$ L original crude human plasma on 12 % SDS-PAGE. 1: Protein ladder 2: Blank 3: Crude plasma (MDS pool) 3: unbound portion (MDS pool) 5: bound portion (MDS pool).

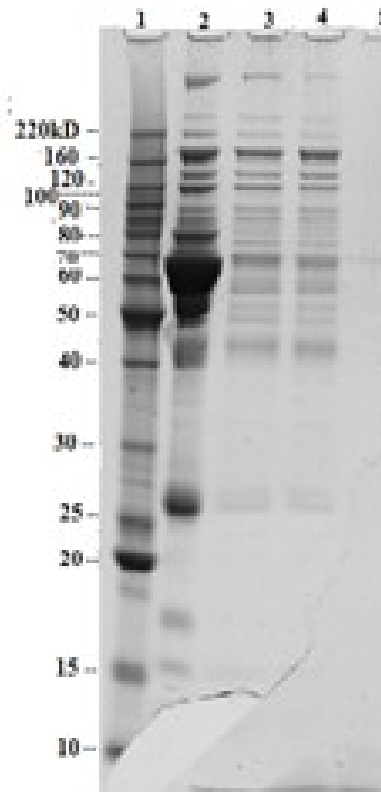

**Figure S 3:** Checking enrichment efficiency of unbound fraction through MARS column by 5Kda MWCO tubes. Fractions loaded were equivalent to 0.1  $\mu$ L original crude human plasma on 12 % SDS-PAGE 1: Protein ladder, 2: Crude plasma (ALL pool) 3: Fraction-2, unbound portion (ALL pool) before cut off tube 4: unbound portion (ALL pool) after cut off tube.

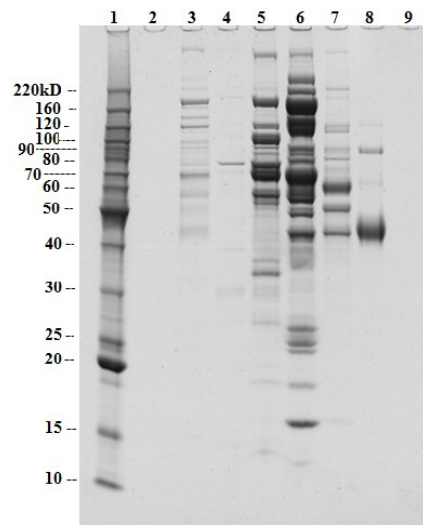

**Figure S 4:** IEF fractions after ZOOM-IEF of ALL pool. 15  $\mu$ L (Max load) of each fraction was loaded onto 12%, 10 well's gel. 1: Protein ladder 2: Blank 3: unbound fraction without ZOO-IEF, 4: Fraction-1 (pH 3.0-4.6) 5: Fraction-2 (pH 4.6-5.4) 6: Fraction-3 (pH 5.4-6.2) 7: Fraction-4 (pH 6.2-7.0) 8: Fraction-5 (pH 7.0-10.0).

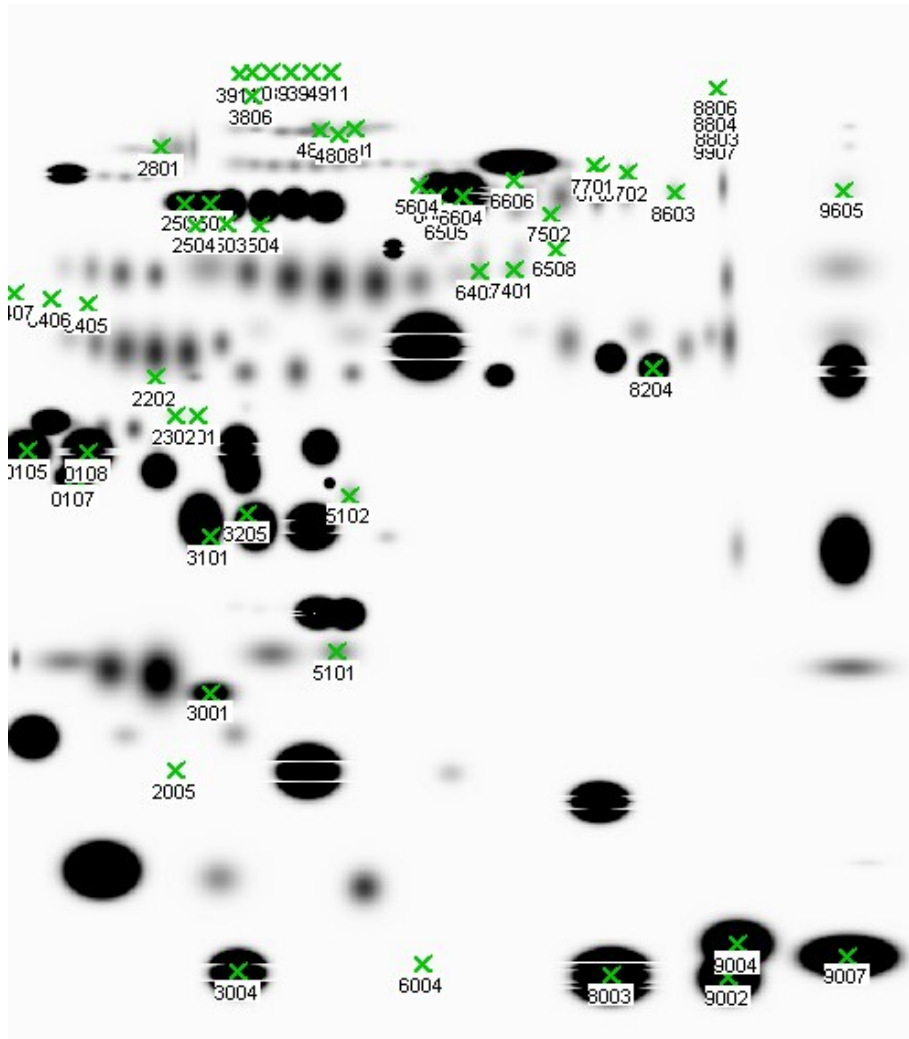

**Figure S 5:** Master gel created from PDQuest software by combining all spots from ALL, APA, MDS and healthy pool's gels

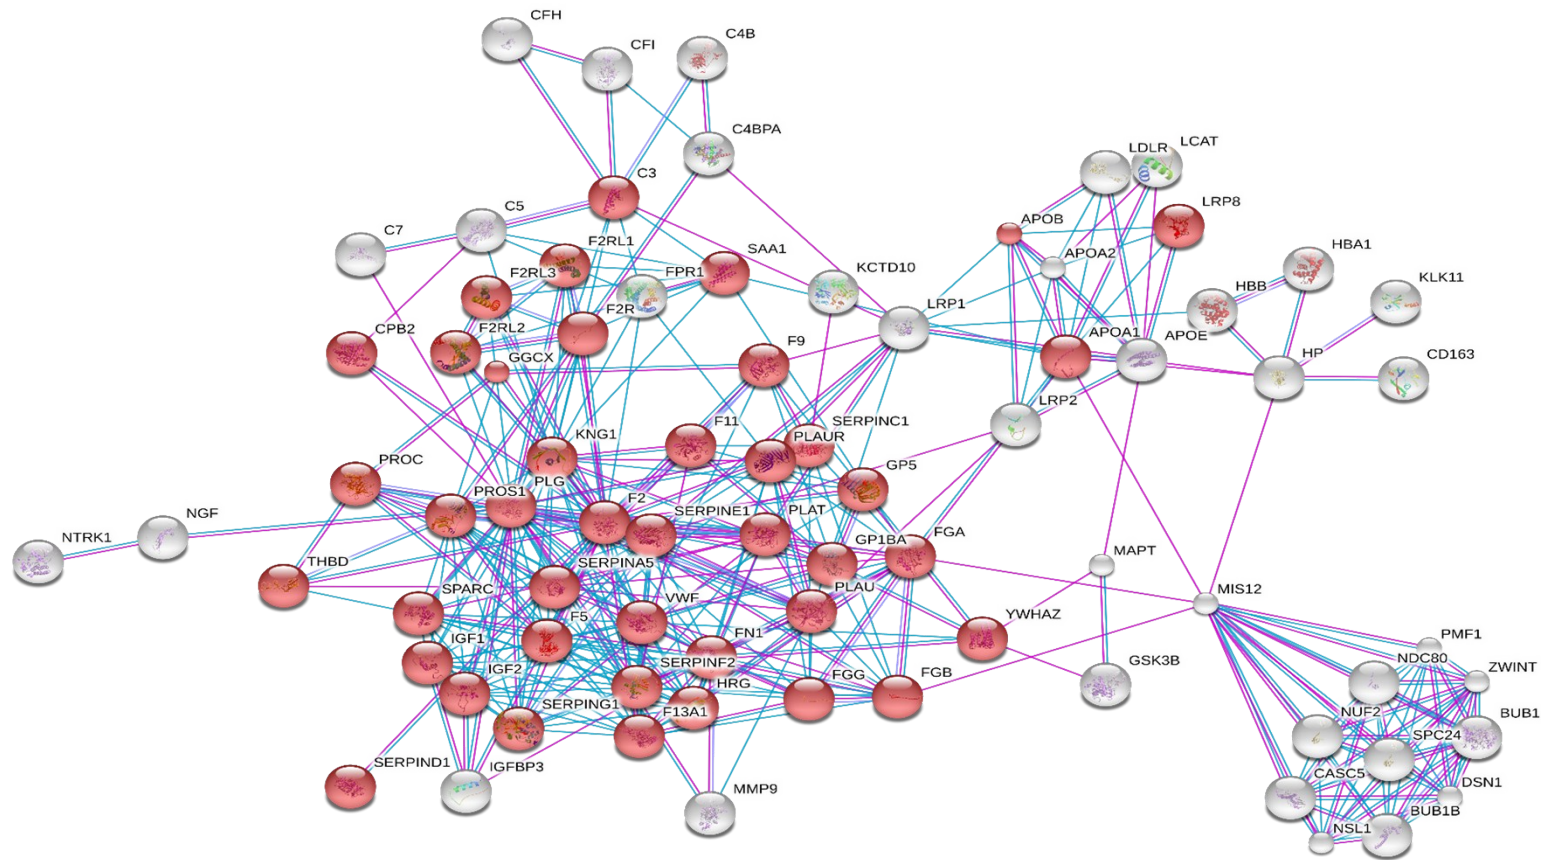

**Figure S 6:** KEGG pathway of eight differentially expressed proteins in acute lymphoblastic leukaemia and preleukemic diseases in comparison to healthy, acquired from online STRING database. Balls with structures show that their 3D structures are also available in database.



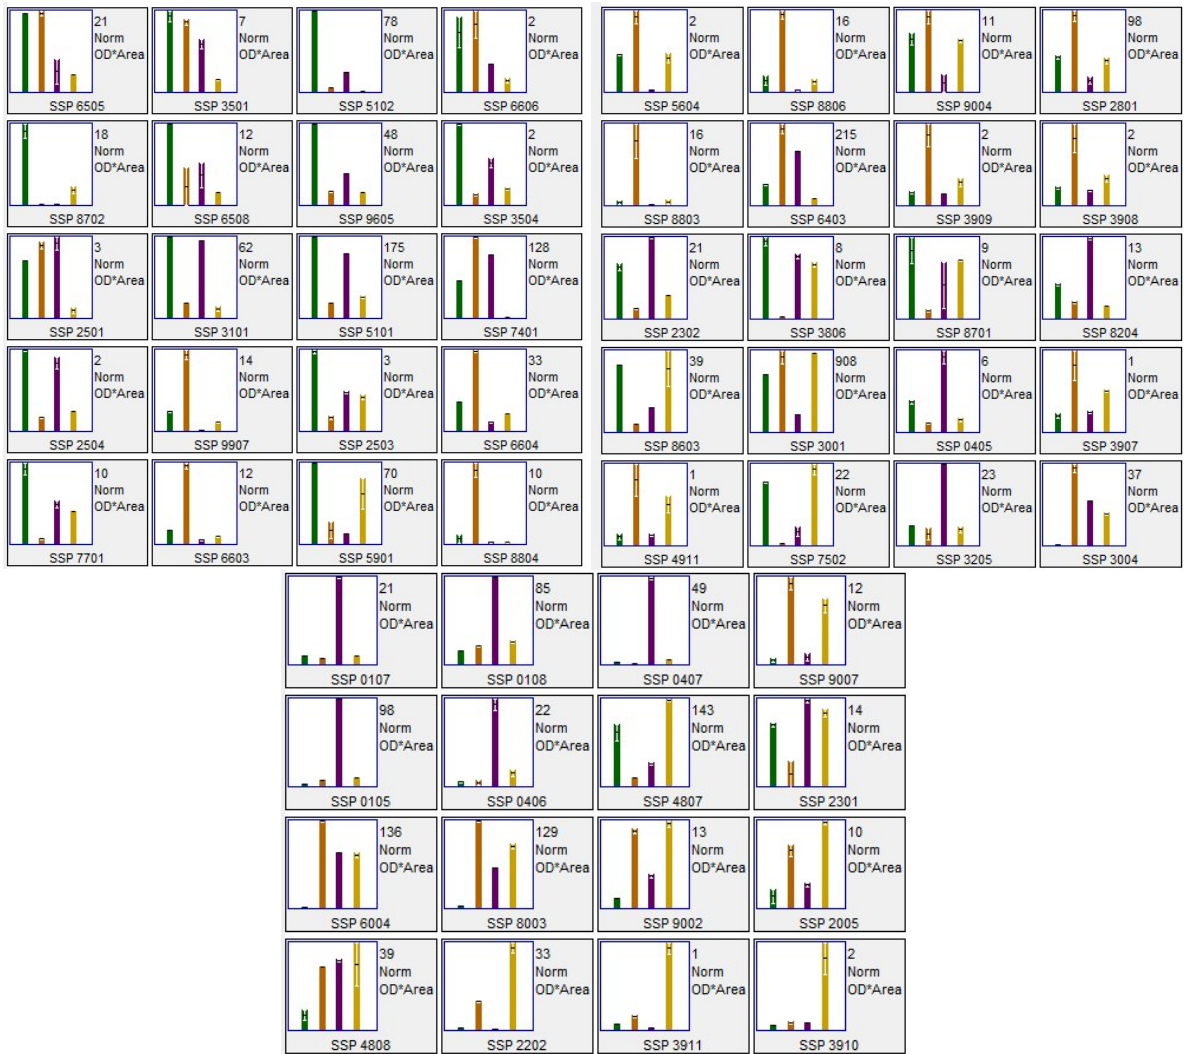

**Figure S 7:** Quantity graph report of differentially expressed proteins in the unbound portion of ALL, preleukemic diseases and healthy pool. Green colour is for healthy, orange colour for ALL, purple colour is for APA, and yellow colour is for MDS. Spots number are those, which are highlighted in Figure 3 with green crosses and are those assigned by PDQuest software

**Acute lymphoblastic leukemia (ALL) (Precursor T lymphoblastic leukemia)**

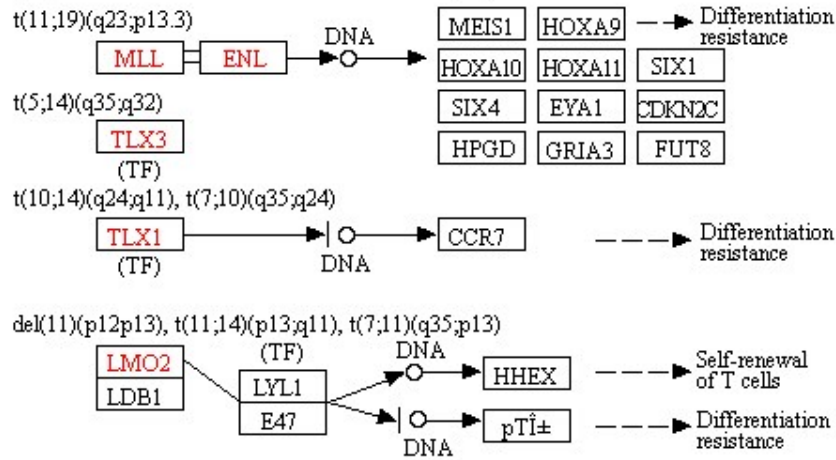

**Acute lymphoblastic leukemia (ALL) (Precursor B lymphoblastic leukemia)**

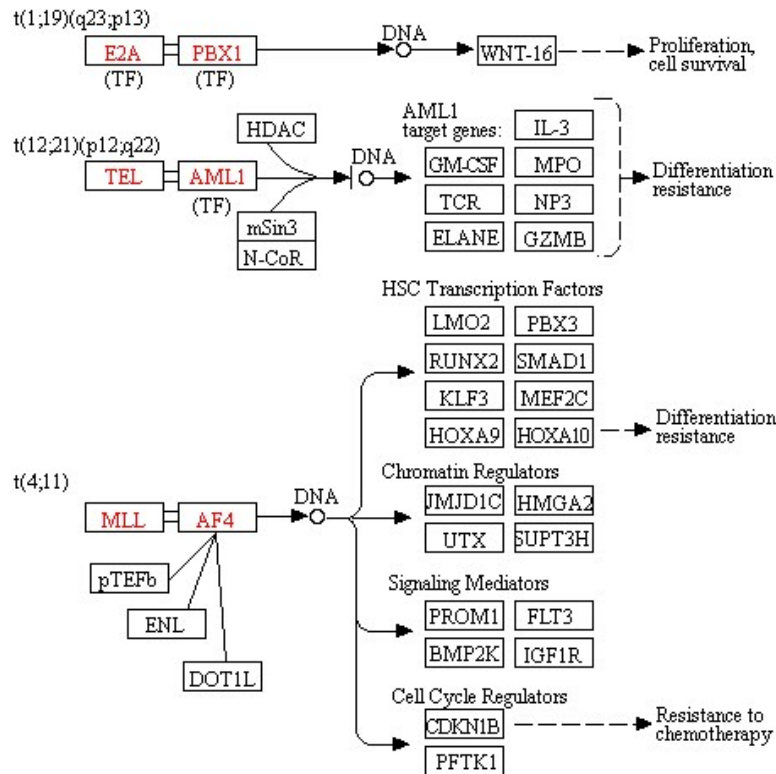

**Figure S 8:** Transcriptional misregulation in cancer.
